# Supplementary material
Source: PubMed Central journal article supplement (PMC3601979)
Supplement: NIHMS51101-supplement-Table_1.pdf [file NIHMS51101-supplement-Table_1.pdf]

**Supplementary Table 1:** Associations of 34 SNPs representative of top 50 stage-1 associations in stages 1 and 2:

| SNP        | Stage-1 Associations<br>(Odds Ratio, p-value)* | Stage-2 Associations<br>(Odds Ratio, p-value) * |
|------------|------------------------------------------------|-------------------------------------------------|
| rs7778273  | 1.96 (1.45-2.65, $p=3.5 \times 10^{-5}$ )      | 0.93 (0.73-1.19, $p=0.59$ )                     |
| rs971398   | 1.52 (1.23-1.88, $p= \times 10^{-4}$ )         | 1.24 (1.05-1.47, $p=0.01$ )                     |
| rs17692126 | 1.63 (1.30-2.04, $p=1.7 \times 10^{-5}$ )      | 1.11 (0.94-1.31, $p=0.21$ )                     |
| rs12084355 | 1.63 (1.28-2.07, $p=6.7 \times 10^{-5}$ )      | 0.94 (0.79-1.11, $p=0.47$ )                     |
| rs1149185  | 1.52 (1.27-1.82, $p=5.9 \times 10^{-6}$ )      | 1.11 (0.97-1.26, $p=0.13$ )                     |
| rs2828300  | 1.58 (1.28-1.95, $p=2.3 \times 10^{-5}$ )      | 1.10 (0.94-1.28, $p=0.23$ )                     |
| rs10415904 | 1.67 (1.30-2.14, $p=4.8 \times 10^{-5}$ )      | 1.11 (0.92-1.33, $p=0.27$ )                     |
| rs8089261  | 0.64 (0.51-0.81, $p=1.4 \times 10^{-4}$ )      | 0.95 (0.81-1.10, $p=0.48$ )                     |
| rs7910841  | 0.64 (0.51-0.80, $p=8.2 \times 10^{-5}$ )      | 0.83 (0.72-0.96, $p=0.01$ )                     |
| rs26150    | 1.49 (1.23-1.80, $p=3.1 \times 10^{-5}$ )      | 1.11 (0.98-1.27, $p=0.10$ )                     |
| rs2401983  | 0.63 (0.51-0.77, $p=1.5 \times 10^{-5}$ )      | 0.91 (0.78-1.04, $p=0.17$ )                     |
| rs2063995  | 1.45 (1.21-1.74, $p=5.5 \times 10^{-5}$ )      | 1.06 (0.93-1.20, $p=0.41$ )                     |
| rs12523819 | 0.64 (0.51-0.80, $p=1.1 \times 10^{-4}$ )      | 0.86 (0.74-0.99, $p=0.04$ )                     |
| rs3785982  | 1.75 (1.36-2.24, $p=1.0 \times 10^{-5}$ )      | 1.24 (1.03-1.48, $p=0.02$ )                     |
| rs2774307  | 1.51 (1.24-1.85, $p=4.3 \times 10^{-5}$ )      | 1.21 (1.05-1.40, $p=0.01$ )                     |
| rs10220397 | 0.63 (0.50-0.79, $p=8.6 \times 10^{-5}$ )      | 0.85 (0.73-0.99, $p=0.04$ )                     |
| rs303850   | 1.48 (1.22-1.79, $p=5.2 \times 10^{-5}$ )      | 1.13 (1.00-1.29, $p=0.05$ )                     |
| rs2285769  | 1.88 (1.40-2.51, $p=2.1 \times 10^{-5}$ )      | 1.14 (0.91-1.42, $p=0.24$ )                     |
| rs2403733  | 1.99 (1.48-2.69, $p=5.6 \times 10^{-6}$ )      | 1.23 (0.98-1.56, $p=0.08$ )                     |
| rs4886078  | 0.69 (0.57-0.83, $p=8.0 \times 10^{-5}$ )      | 1.03 (0.91-1.17, $p=0.64$ )                     |
| rs1387389  | 1.47 (1.22-1.77, $p=5.0 \times 10^{-5}$ )      | 1.20 (1.05-1.37, $p=0.007$ )                    |
| rs1513848  | 1.87 (1.41-2.46, $p=1.0 \times 10^{-5}$ )      | 1.25 (1.01-1.55, $p=0.04$ )                     |
| rs10853246 | 0.64 (0.53-0.77, $p=4.3 \times 10^{-6}$ )      | 0.99 (0.86-1.12, $p=0.84$ )                     |
| rs948331   | 0.64 (0.53-0.78, $p=5.2 \times 10^{-6}$ )      | 0.99 (0.86-1.12, $p=0.83$ )                     |

|             |                                           |                              |
|-------------|-------------------------------------------|------------------------------|
| rs3884558   | 1.84 (1.40-2.41, $p=1.3 \times 10^{-5}$ ) | 1.29 (1.05-1.57, $p=0.01$ )  |
| rs17773390  | 0.64 (0.52-0.79, $p=3.9 \times 10^{-5}$ ) | 1.03 (0.90-1.19, $p=0.64$ )  |
| rs421379    | 1.98 (1.46-2.69, $p=1.2 \times 10^{-5}$ ) | 1.42 (1.11-1.81, $p=0.005$ ) |
| rs12576144, | 1.52 (1.25-1.85, $p=2.4 \times 10^{-5}$ ) | NA                           |
| rs2280958,  | 0.68 (0.56-0.82, $p=4.6 \times 10^{-5}$ ) | NA                           |
| rs2415487   | 1.54 (1.26-1.88, $p=2.5 \times 10^{-5}$ ) | NA                           |
| rs6065734   | 1.62 (1.25-2.10, $p=2.2 \times 10^{-4}$ ) | NA                           |
| rs7651835   | 1.60 (1.27-2.02, $p=6.6 \times 10^{-5}$ ) | NA                           |
| rs9346105   | 1.88 (1.40-2.52, $p=2.2 \times 10^{-5}$ ) | NA                           |
| rs9843503   | 0.32 (0.18-0.57, $p=1.2 \times 10^{-4}$ ) | NA                           |

\*All associations have been adjusted for ER-status and one SNP was exclude based on high duplicate error rate.
